# Supplementary material
Source: Springer Nature journal article supplement (https://www.springermedizin.de/resource/supplementary/12958_2009_604_MOESM3_ESM.pdf/9568080)

### CD56<sup>++</sup>/CD16<sup>-</sup>

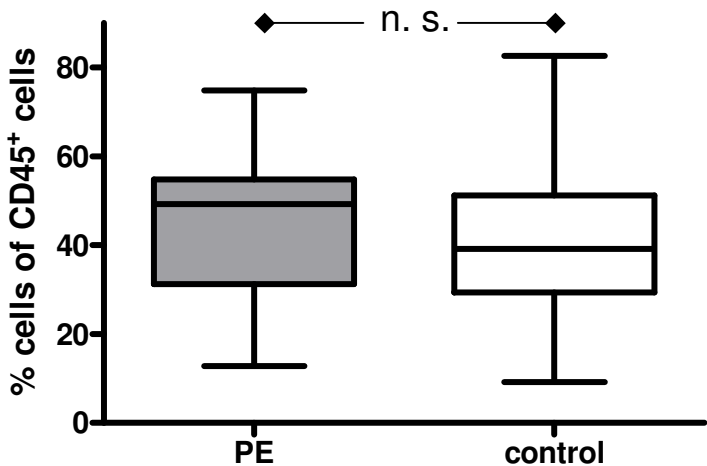

### CD56<sup>+</sup>/CD16<sup>+</sup>

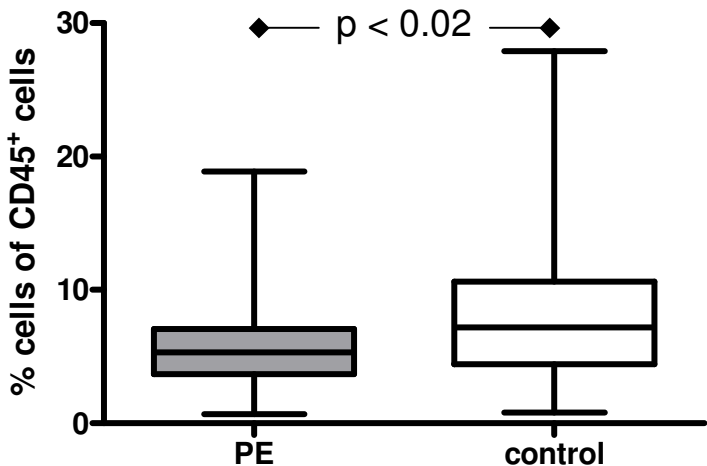

### CD16

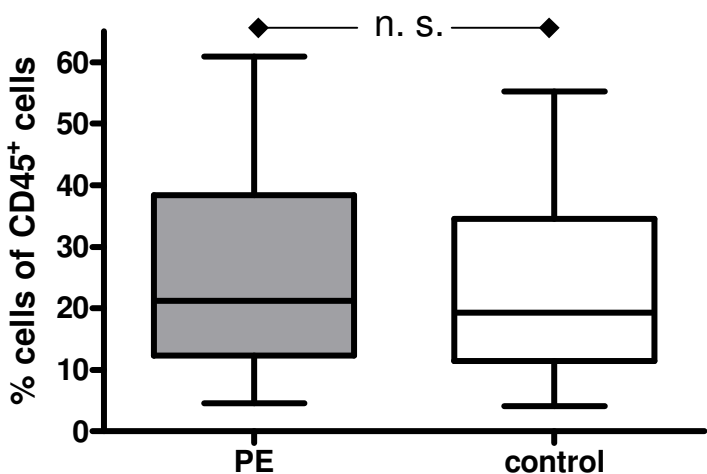

Supplement: MOESM3 [file 9568080]
